# Supplementary material for: Structural Properties of Epoxy–Silica Barrier Coatings for Corrosion Protection of Reinforcing Steel
Source: MDPI journal article supplement (doi:10.3390/polym14173474), 2022-08-25
Supplement: s1 [file s1]

Supplementary File

# Structural Properties of Epoxy-Silica Barrier Coatings for Corrosion Protection of Reinforcing Steel

Mayara Carla Uvida, Adriana de Araújo Almeida, Sandra Helena Pulcinelli, Celso Valentim Santilli and Peter Hammer\*

São Paulo State University (UNESP), Institute of Chemistry, 14800-060, Araraquara/SP, Brazil; mayara.uvida@unesp.br, adriana.a.almeida@unesp.br, sandra.h.pulcinelli@unesp.br, cv.santilli@unesp.br  
\* Correspondence: peter.hammer@unesp.br; Tel.: +55 16 3301 9887

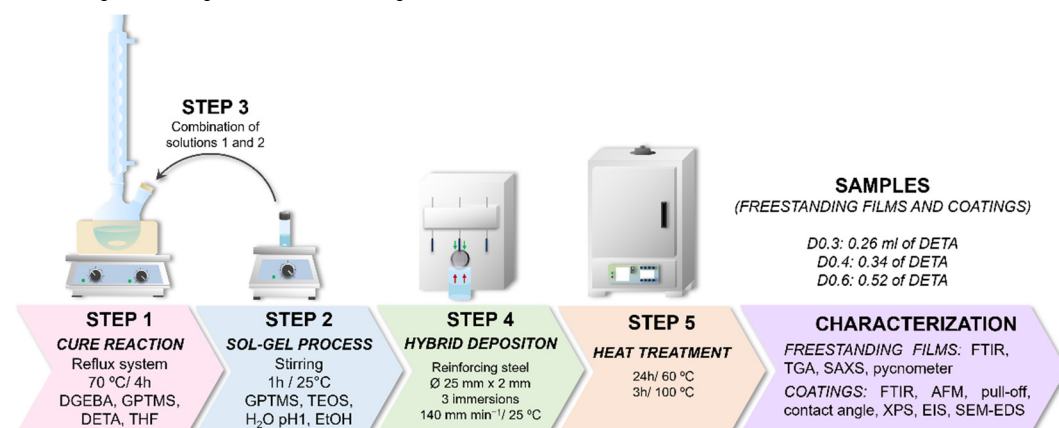

Figure S1. Experimental procedure for epoxy-silica hybrids.

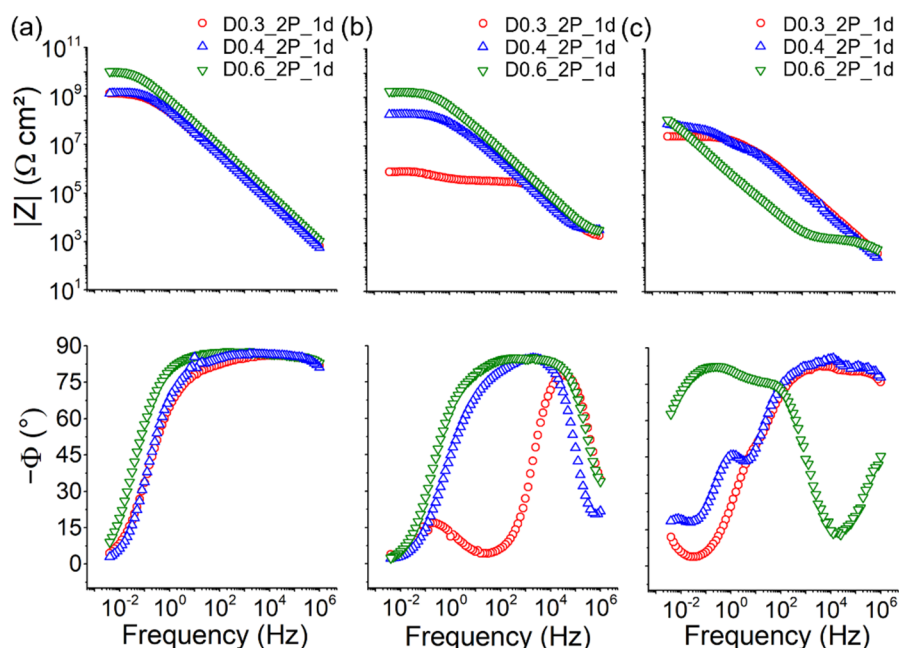

Figure S2. Bode plots for duplicates of epoxy-silica hybrid coatings prepared with different DETA/DGEBA ratios after 1 day of exposure in solution: (a) 3.5 wt% NaCl, (b) SCPS1 (pH 8) and (c) SCPS2 (pH 14).

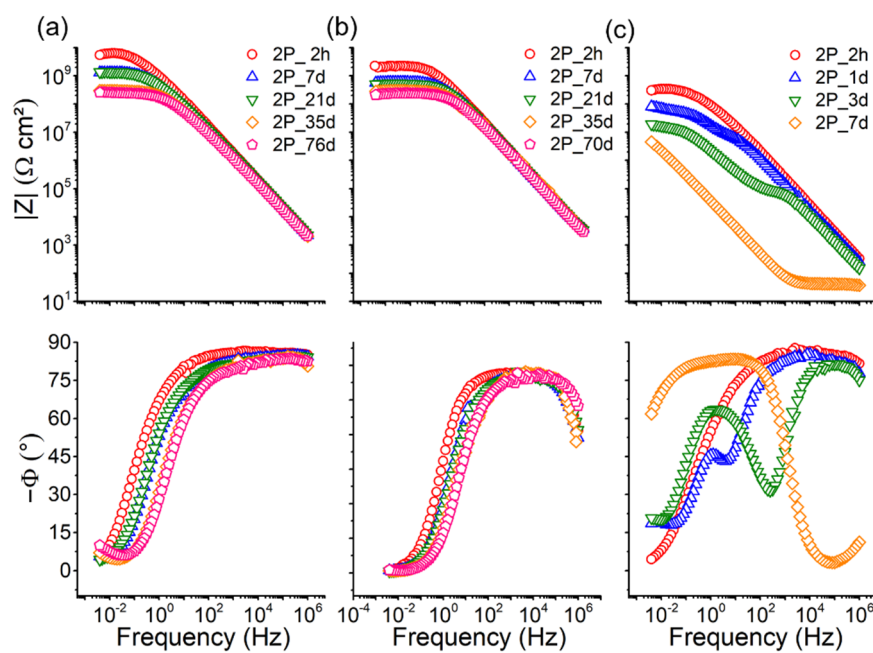

**Figure S3.** Bode plots for duplicates of epoxy-silica hybrid coating prepared with DETA/DGEBA = 0.4 as a function of immersion time in: (a) 3.5 wt % NaCl, (b) SCPS1 (pH 8), and (c) SCPS2 (pH 14) solution.
